# Supplementary material for: Catheter Ablation of Atrial Fibrillation in Patients with Previous Lobectomy or Partial Lung Resection: Long-Term Results of an International Multicenter Study
Source: MDPI journal article supplement (doi:10.3390/jcm11061481), 2022-03-08
Supplement: s1 [file s1]

**Table S1.** Literature cohort comparison.

|                                     | <b>Kanmanthareddy et al.</b> (J Cardiovasc Electrophysiol 2015;26:385-389) | <b>Fink et al.</b> (Pacing Clin Electrophysiol 2020;43:1115-1125) | <b>This study</b> |
|-------------------------------------|----------------------------------------------------------------------------|-------------------------------------------------------------------|-------------------|
| Number of patients                  | 15                                                                         | 19                                                                | 20                |
| Mean age                            | 63 ± 7                                                                     | 66 ± 10                                                           | 64 ± 10           |
| Females                             | 0%                                                                         | 53%                                                               | 40%               |
| <b>Type of AF</b>                   |                                                                            |                                                                   |                   |
| Paroxysmal                          | 53%                                                                        | 47%                                                               | 65%               |
| Persistent                          | 47%                                                                        | 42%                                                               | 35%               |
| Longstanding persistent             | -                                                                          | 11%                                                               | -                 |
| LVEF                                | 53% ± 5%                                                                   | >55% (100% of pts)                                                | 57% ± 7.1%        |
| <b>Energy source for PVI</b>        |                                                                            |                                                                   |                   |
| RF, manual                          | 100%                                                                       | 68%                                                               | 65%               |
| RF, robotic                         | 0%                                                                         | 5%                                                                | 0%                |
| Cryoablation                        | 0%                                                                         | 21%                                                               | 35%               |
| HIFU                                | 0%                                                                         | 5%                                                                | 0%                |
| <b>Procedural data</b>              |                                                                            |                                                                   |                   |
| Procedural time                     | 200 ± 33                                                                   | 127.4 ± 48.4                                                      | 135 ± 76.2        |
| Fluoroscopy time                    | 79 ± 21                                                                    | 17.3 ± 9.2                                                        | 20.1 ± 17.8       |
| Adverse events                      | 2 (13%)                                                                    | 1 (5%)                                                            | 0                 |
| <b>Follow-up data</b>               |                                                                            |                                                                   |                   |
| Duration of follow-up (days)        | No follow-up available                                                     | 268 (185; 1024)                                                   | 891 (450 – 1470)  |
| Patients with arrhythmia recurrence | -                                                                          | 63%                                                               | 35%               |

AF: atrial fibrillation; LVEF: left ventricle ejection fraction; PVI: pulmonary vein isolation; HIFU: high intensity focused ultrasound
